## Reversibility of A $\beta$ oligomer neurotoxicity

Wataru Araki

Patients with Alzheimer's disease (AD), the most common neurodegenerative dementia disorder, chiefly suffer from impairment of memory and other cognitive functions. AD is neuropathologically characterized by senile plaques and neurofibrillary tangles, which are composed of amyloid  $\beta$ -protein (A $\beta$ ) and phosphorylated tau proteins, respectively. Recently, a new concept has emerged: that soluble oligomeric forms of A $\beta$  (A $\beta$  oligomers), but not A $\beta$  fibrils, play a primary pathogenic role in the pathological cascade of AD [1, 2]. This idea is based on findings that soluble forms of A $\beta$  provoke neurotoxic effects, including tau abnormalities (especially hyperphosphorylation), functional and structural abnormalities of synapses, and induction of neuronal death. This concept is supported by numerous studies that have employed a variety of experimental systems, including cell culture, brain slices and animal models, as well as the fact that A $\beta$  oligomers are abundant in post-mortem AD brains [1, 2]. Thus, oligomeric A $\beta$  is considered a major culprit in the molecular pathology of AD.

To investigate the pathological roles of A $\beta$  oligomers, we have established a neuron culture model system, in which rat primary neurons are exposed to relatively low concentrations ( $\sim 2.5$   $\mu$ M) of A $\beta$ 42 oligomers (A $\beta$ -O) for relatively long periods (2-3 days) [3, 4]. We observed that A $\beta$ -O induces neurotoxic insults with limited cell death under these conditions, producing effects that include activation of caspase-3 and eIF2 $\alpha$  (eukaryotic translation initiation factor 2 $\alpha$ ), indicative of induction of apoptosis and other stress responses; abnormal alterations of tau proteins (increased phosphorylation and caspase-mediated cleavage); as well as abnormal alterations of  $\beta$ -catenin (reduced protein levels and dislocalization) (Figure 1) [3, 4].  $\beta$ -catenin is known to play important roles in regulating synaptic structures and plasticity as well as Wnt signaling [5]. Because these changes are reflective of characteristic pathological features of AD, this neuron model is considered a useful system for investigating the neurotoxic mechanisms triggered by A $\beta$  oligomers.

We were interested in the question of whether the neurotoxicity of A $\beta$  oligomers is reversible and abates upon their removal, an issue that has remained largely unexplored. To investigate this possibility, we designed the following experimental paradigm: Rat primary cultured neurons were treated with A $\beta$ -O for 2 days, at which point cells were deprived of A $\beta$ -O by replacing the medium with fresh medium lacking A $\beta$ -O, or were re-provided A $\beta$ -O,

and cultured for an additional 2 days; untreated neurons were used as controls. Neurons continuously treated with A $\beta$ -O showed greater activation of caspase-3 and eIF2 $\alpha$ , and exhibited persistent, abnormal alterations of tau and  $\beta$ -catenin. In contrast, upon A $\beta$  deprivation, caspase-3 and eIF2 $\alpha$  activation were considerably attenuated, aberrant phosphorylation and caspase-mediated cleavage of tau recovered for the most part, and abnormal alterations of  $\beta$ -catenin were partially reversed (Figure 1). Notably, A $\beta$ -O-induced  $\beta$ -catenin dislocation appeared to be associated with perturbation of synaptic organization [4]. These results indicate that removal of extracellular A $\beta$ -O can fully or partially reverse A $\beta$ -O-induced neurotoxic and synaptotoxic alterations in our neuron model. Our findings suggest that A $\beta$  oligomer-associated neurotoxicity is a reversible process in that neurons are capable of recovering from moderate neurotoxic insults. These data also support the idea that A $\beta$  oligomers act on the cell surface of neurons to transmit aberrant signals, resulting in various abnormal cellular responses; upon A $\beta$  oligomer removal, the aberrant signals subside, resulting in reversal of all abnormal responses (Figure 1).

A few previous studies have obtained results consistent with the reversible toxicity of A $\beta$  oligomers.

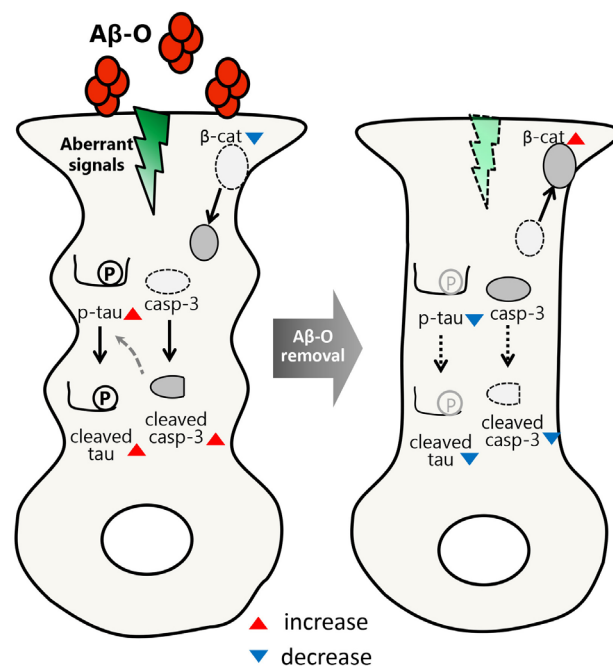

**Figure 1: Reversibility of A $\beta$  oligomer neurotoxicity.** Casp-3: caspase-3;  $\beta$ -cat:  $\beta$ -catenin; p-tau: phosphorylated tau.

For example, a study using mouse organotypic slices found that A $\beta$ -induced spine loss recovers following A $\beta$  washout [6]. However, several important issues have yet to be elucidated. Oligomeric A $\beta$  possibly exerts its effect through A $\beta$  oligomer receptors on the cell surface; however, which receptors or molecules among a variety of candidates are genuine mediators of A $\beta$  oligomer toxicity remains uncertain [2]. How A $\beta$  oligomers almost simultaneously affect synapses, tau, and cell-death pathways is also an important question for further investigation. Additionally, it remains unclear which types of A $\beta$  oligomers among the various forms with different molecular sizes are most bioactive [2, 7].

The reversible nature of the neurotoxicity of A $\beta$  oligomers has significant implications for therapeutic strategies for AD. Notably, any treatment designed to remove or reduce A $\beta$  oligomers could be effective in halting or even reversing the progression of the very early pathology of AD. Currently, immunotherapy targeting A $\beta$  oligomers and inhibitors of BACE1 (an essential protease for A $\beta$  production) are promising therapeutic options [7, 8]. Alternatively, any agent that protects neurons from A $\beta$  oligomer neurotoxicity may be beneficial as a complementary treatment. It should be possible to verify the clinical efficacy of drugs targeting A $\beta$  oligomers in future clinical trials in which individuals with mild cognitive impairment (prodromal AD) or preclinical AD are enrolled.

Wataru Araki: Department of Demyelinating Disease and Aging, National Institute of Neuroscience, National Center of Neurology and Psychiatry, Tokyo, Japan

**Correspondence to:** Wataru Araki, **email** araki@ncnp.go.jp

**Keywords:** Alzheimer's disease, amyloid  $\beta$ -protein, neuron, neurotoxicity, oligomer

**Received:** June 27, 2017

**Published:** July 07, 2017

## REFERENCES

1. Walsh DM, et al. *J Neurochem.* 2007; 101: 1172-1184.
2. Viola KL, et al. *Acta Neuropathol.* 2015; 129: 183-206.
3. Mamada N, et al. *Mol Brain.* 2015; 8: 73.
4. Tanokashira D, et al. *Mol Brain.* 2017; 10: 4.
5. Maguschak KA, et al. *Neuropharmacology.* 2012; 62: 78-88.
6. Shrestha BR, et al. *Mol Cell Neurosci.* 2006; 33: 274-282.
7. Goure WF et al. *Alzheimers Res Ther.* 2014; 6: 42.
8. Yan R, et al. *Lancet Neurol.* 2014; 13: 319-329.

Copyright: Araki. This is an open-access article distributed under the terms of the Creative Commons Attribution License 3.0 (CC BY 3.0), which permits unrestricted use, distribution, and reproduction in any medium, provided the original author and source are credited.
